# Supplementary material for: Chitosan Hydrogels Cross-Linked with Trimesic Acid for the Delivery of 5-Fluorouracil in Cancer Therapy
Source: MDPI journal article supplement (doi:10.3390/pharmaceutics15041084), 2023-03-28
Supplement: s1 [file s1]

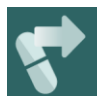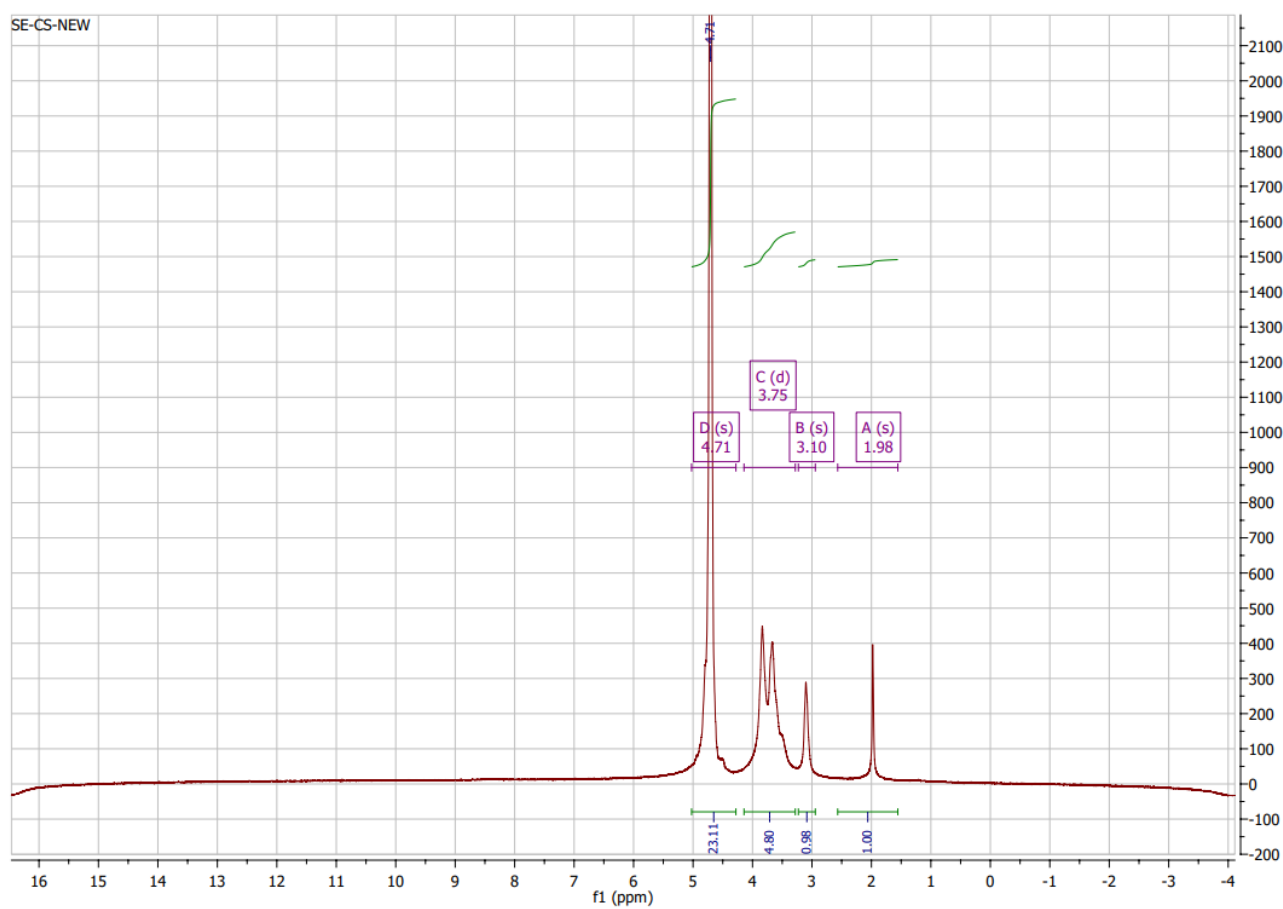

**Figure S1.**  $^1\text{H}$  NMR spectra of chitosan (i).

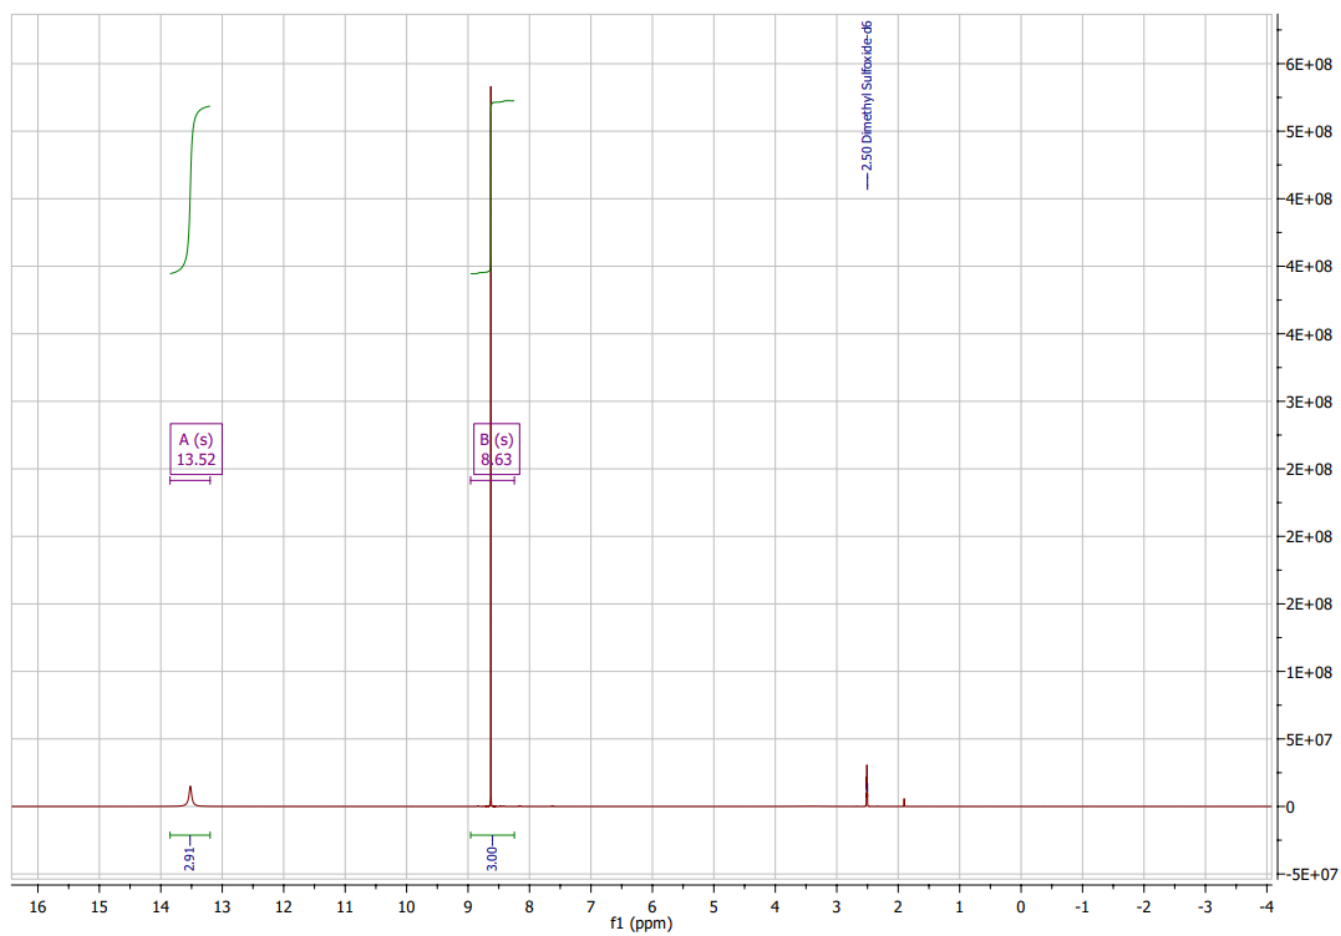

**Figure S2.**  $^1\text{H}$  NMR spectra of BTC (iii).

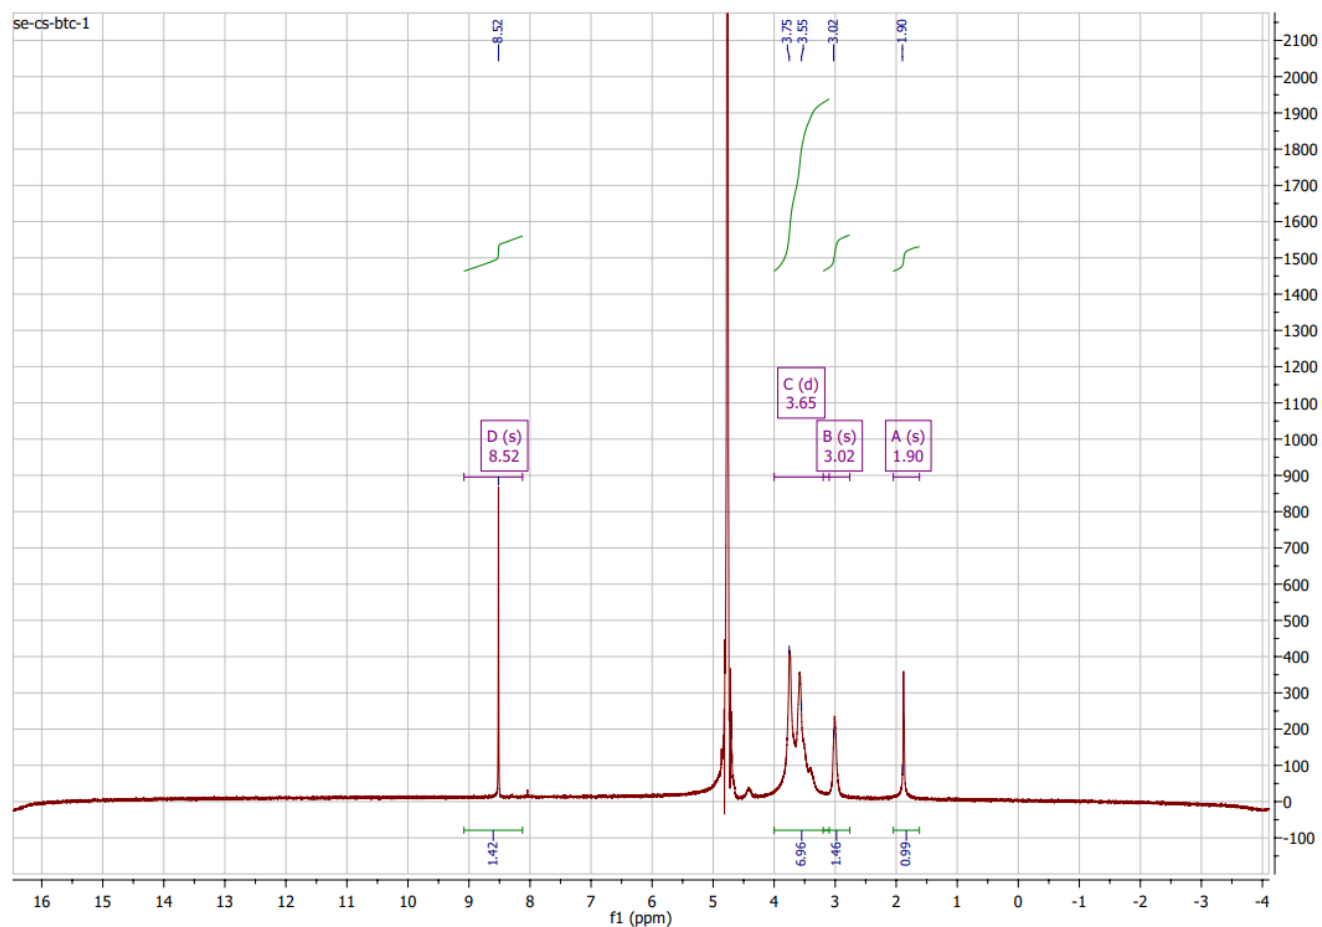

Figure S3.  $^1\text{H}$  NMR spectra of chitosan glucosamine carboxylate salt (iv).

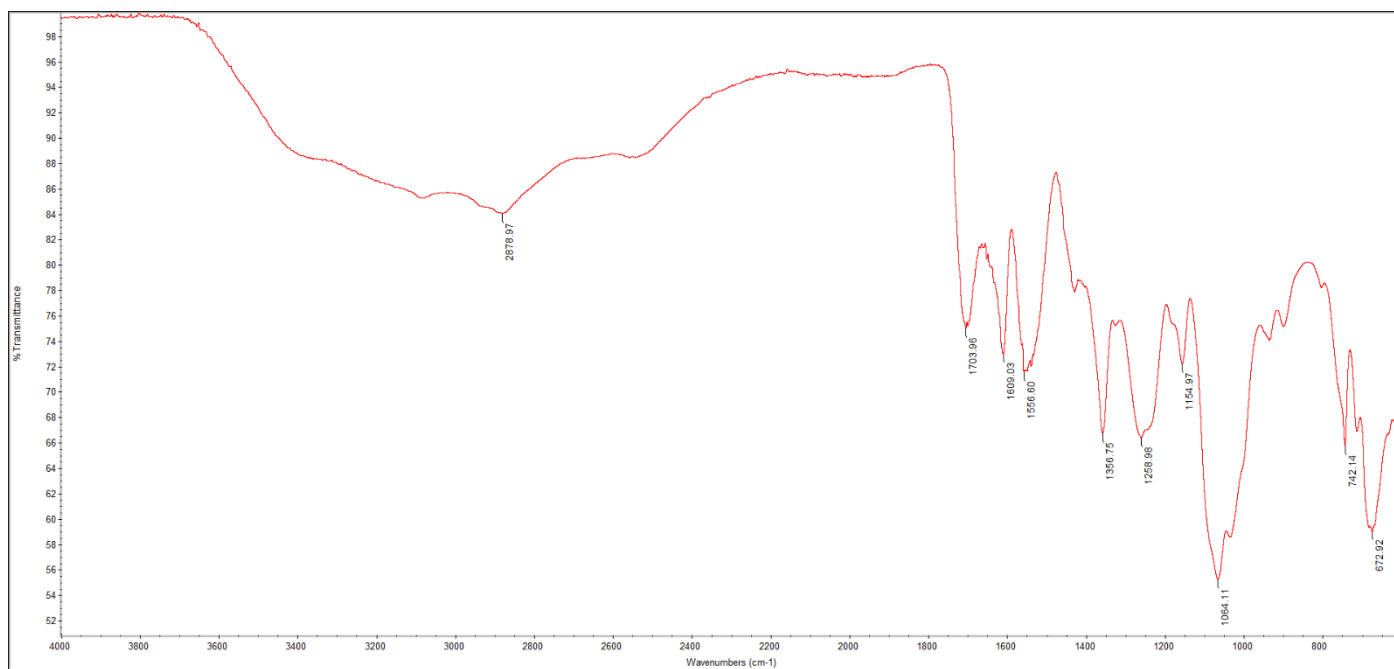

Figure S4. IR spectra of M1 hydrogel.

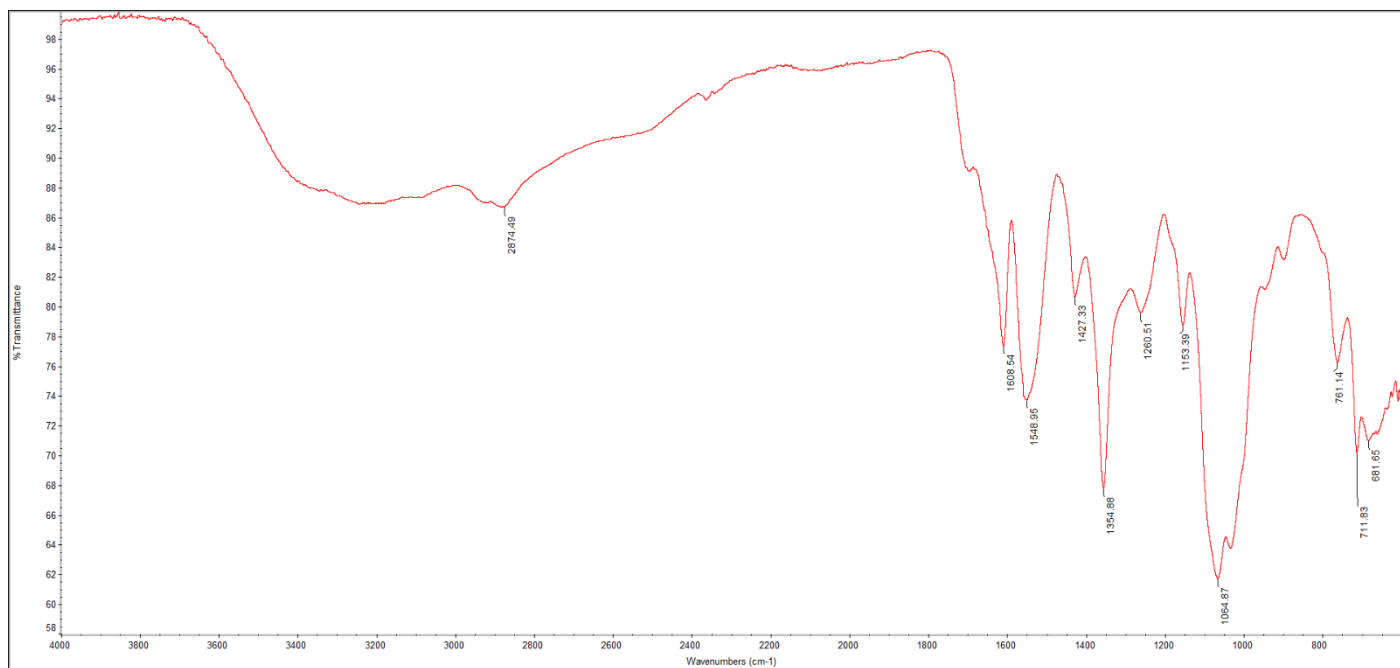

**Figure S5.** IR of M2 hydrogel.

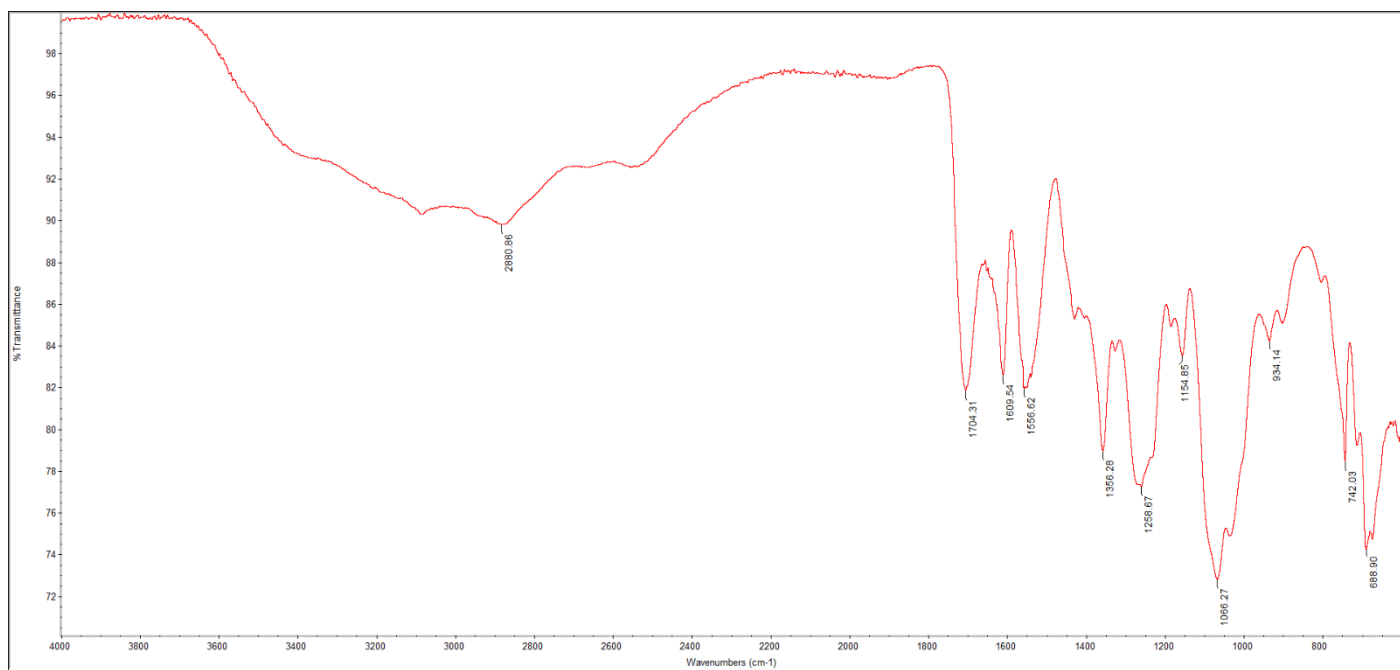

**Figure S6.** IR spectra of M3 hydrogel.

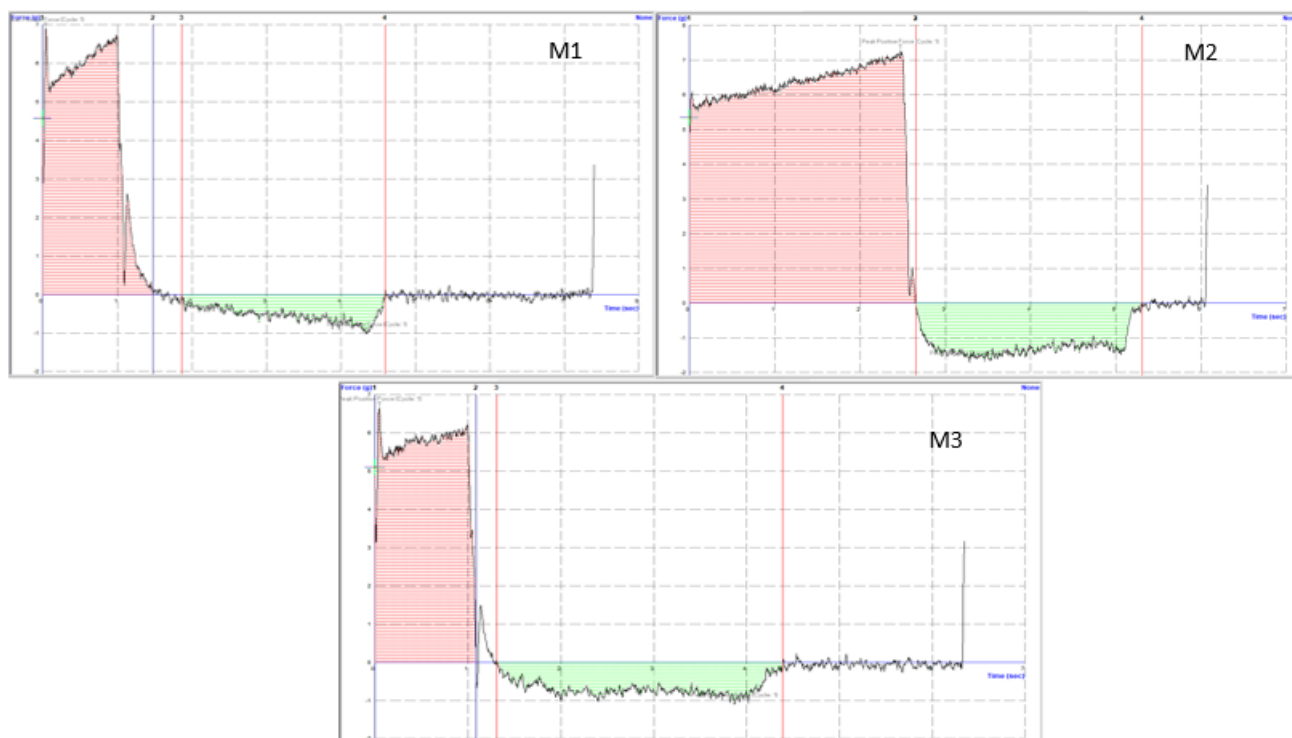

**Figure S7.** Force vs. time plot of chitosan-BTC hydrogels in three different concentrations: M1, M2, and M3.

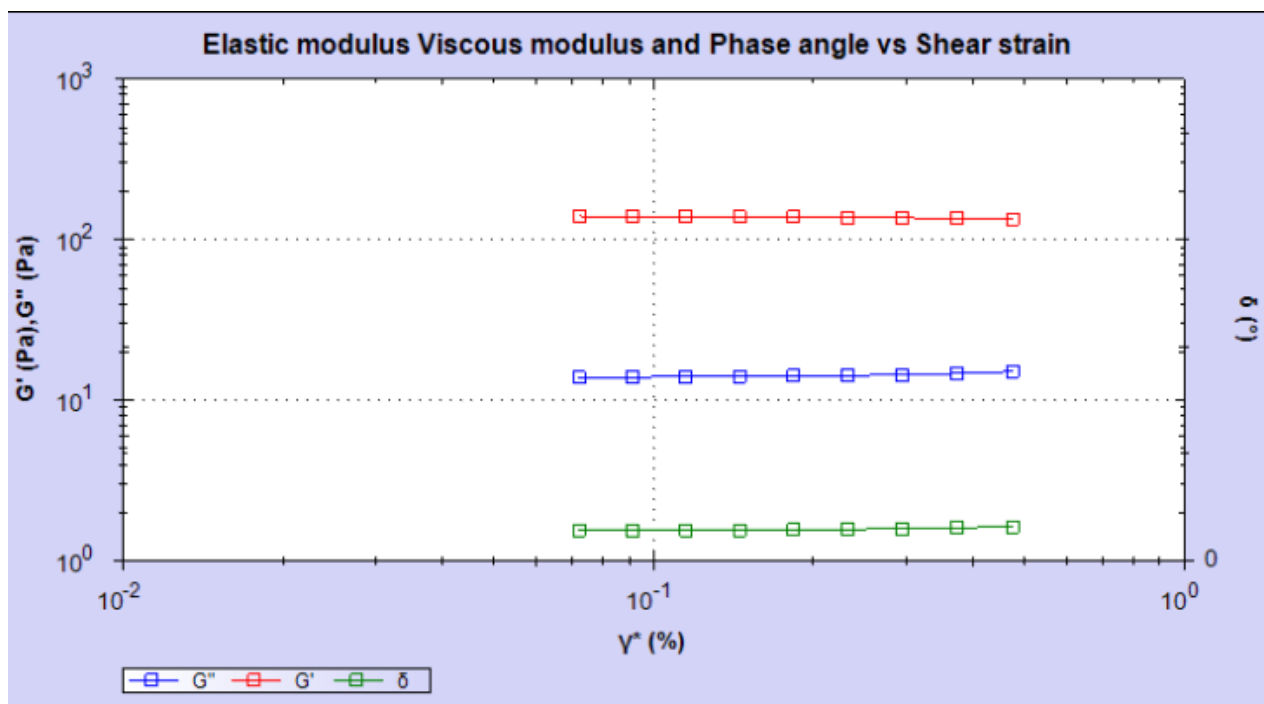

**Figure S8.** Oscillation dynamics of elastic and viscous moduli of chitosan cross-linked with BTC (M1 hydrogel).

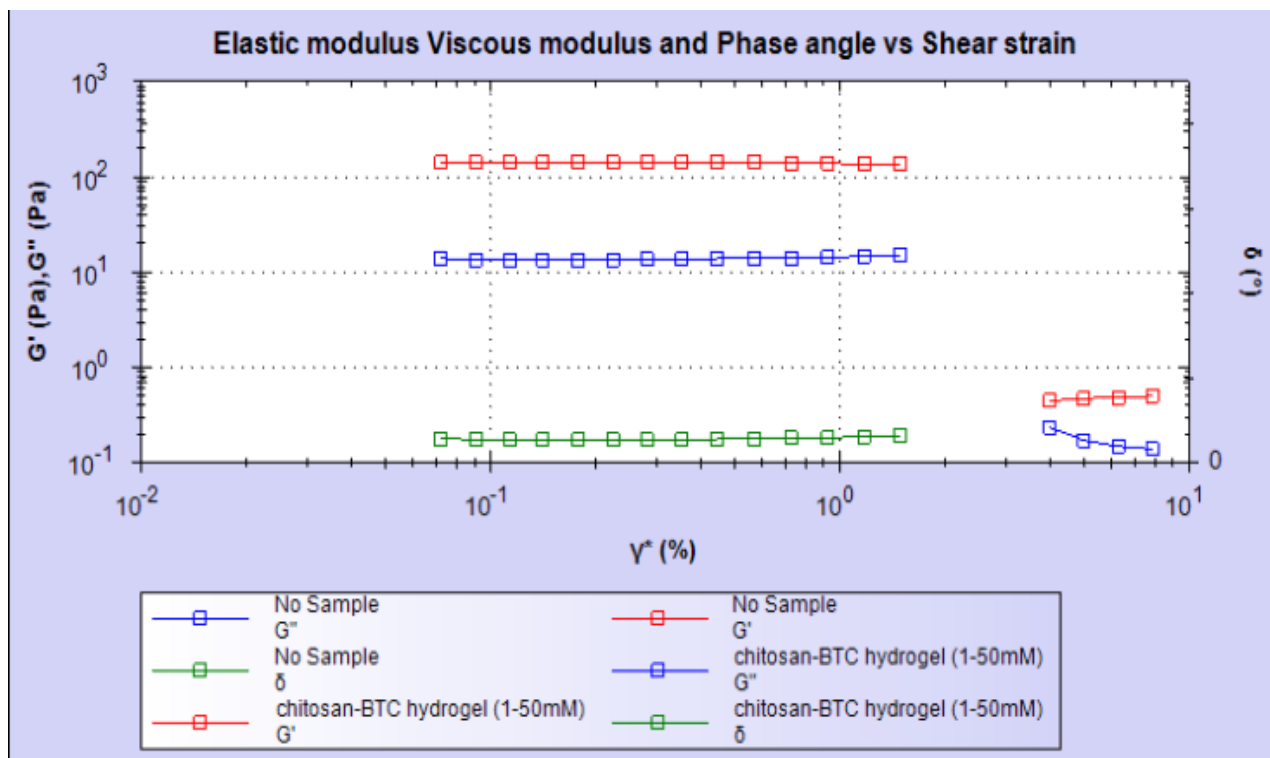

**Figure S9.** Oscillation dynamics of elastic and viscous moduli of chitosan cross-linked with BTC (M2 hydrogel).

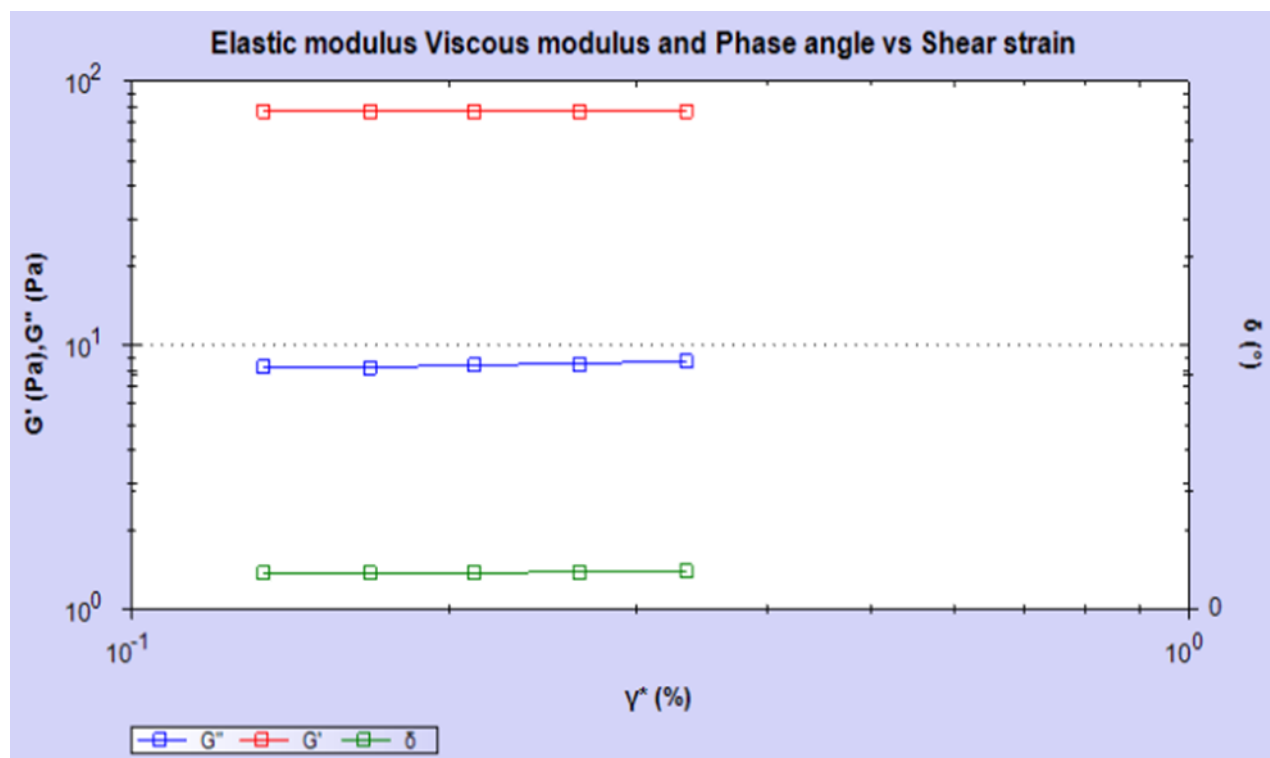

**Figure S10.** Oscillation dynamics of elastic and viscous moduli of chitosan cross-linked with BTC (M3 hydrogel).

**Table S1.** Hydrogels compositions.

| Chitosan Gels | Chitosan (g) | Acetic Acid (mL) | BTC (g) | Ethanol (mL) |
|---------------|--------------|------------------|---------|--------------|
| M1            | 2.5          | 250              | 2.625   | 250          |
| M2            | 2.5          | 250              | 0.525   | 50           |
| M3            | 1.25         | 125              | 2.625   | 250          |

**Table S2.** Amplitude strain sweep for hydrogels with chitosan–BTC concentration 1–10 Mm (supplementary material).

| Complex Shear Strain (%) | Complex Shear Stress (Pa) | Shear Modulus (Complex Component) (Pa) | Shear Modulus (Elastic Component) (Pa) | Shear Modulus (Viscous Component) (Pa) | Shear Viscosity (Complex Component) (Pa s) | Phase Angle (Â°) | Time (s) | Torque (N m)          |
|--------------------------|---------------------------|----------------------------------------|----------------------------------------|----------------------------------------|--------------------------------------------|------------------|----------|-----------------------|
| 0.072263                 | 0.1018                    | 140.9                                  | 140.2                                  | 13.91                                  | 22.43                                      | 5.66             | 20       | $1.71 \times 10^{-6}$ |
| 0.091081                 | 0.1282                    | 140.8                                  | 140.1                                  | 13.95                                  | 22.4                                       | 5.69             | 40.01    | $2.15 \times 10^{-6}$ |
| 0.114901                 | 0.1614                    | 140.5                                  | 139.8                                  | 14.03                                  | 22.36                                      | 5.73             | 60.02    | $2.70 \times 10^{-6}$ |
| 0.14512                  | 0.2032                    | 140.0                                  | 139.3                                  | 14.06                                  | 22.29                                      | 5.76             | 80.04    | $3.41 \times 10^{-6}$ |
| 0.183392                 | 0.2558                    | 139.5                                  | 138.8                                  | 14.16                                  | 22.20                                      | 5.83             | 100.1    | $4.29 \times 10^{-6}$ |
| 0.232032                 | 0.3221                    | 138.8                                  | 138.1                                  | 14.25                                  | 22.09                                      | 5.89             | 120.1    | $5.40 \times 10^{-6}$ |
| 0.293968                 | 0.4056                    | 138.0                                  | 137.2                                  | 14.44                                  | 21.96                                      | 6.01             | 140.1    | $6.80 \times 10^{-6}$ |
| 0.372866                 | 0.5106                    | 136.9                                  | 136.2                                  | 14.73                                  | 21.80                                      | 6.18             | 160.1    | $8.56 \times 10^{-6}$ |
| 0.474208                 | 0.643                     | 135.6                                  | 134.7                                  | 15.11                                  | 21.58                                      | 6.40             | 180.1    | $1.08 \times 10^{-5}$ |

**Table S3.** Amplitude strain sweep for hydrogels with chitosan–BTC concentration 1–50 mM (supplementary material).

| Complex Shear Strain (%) | Complex Shear Stress (Pa) | Shear Modulus (Complex Component) (Pa) | Shear Modulus (Elastic Component) (Pa) | Shear Modulus (Viscous Component) (Pa) | Shear Viscosity (Complex Component) (Pa s) | Phase Angle (Â°) | Torque (N m)          |
|--------------------------|---------------------------|----------------------------------------|----------------------------------------|----------------------------------------|--------------------------------------------|------------------|-----------------------|
| 0.071935                 | 0.1018                    | 141.5                                  | 140.9                                  | 13.94                                  | 22.53                                      | 5.65             | $1.71 \times 10^{-6}$ |
| 0.09063                  | 0.1282                    | 141.4                                  | 140.8                                  | 13.49                                  | 22.51                                      | 5.47             | $2.15 \times 10^{-6}$ |
| 0.11339                  | 0.1614                    | 142.3                                  | 141.7                                  | 13.32                                  | 22.65                                      | 5.37             | $2.7 \times 10^{-6}$  |
| 0.141341                 | 0.2031                    | 143.7                                  | 143.1                                  | 13.39                                  | 22.87                                      | 5.35             | $3.4 \times 10^{-6}$  |
| 0.177932                 | 0.2557                    | 143.7                                  | 143.1                                  | 13.38                                  | 22.87                                      | 5.34             | $4.28 \times 10^{-6}$ |
| 0.223731                 | 0.3219                    | 143.9                                  | 143.2                                  | 13.45                                  | 22.9                                       | 5.36             | $5.39 \times 10^{-6}$ |
| 0.280822                 | 0.4052                    | 144.3                                  | 143.7                                  | 13.58                                  | 22.97                                      | 5.40             | $6.79 \times 10^{-6}$ |
| 0.35369                  | 0.5102                    | 144.2                                  | 143.6                                  | 13.71                                  | 22.96                                      | 5.45             | $8.55 \times 10^{-6}$ |
| 0.4465                   | 0.6423                    | 143.8                                  | 143.2                                  | 13.86                                  | 22.89                                      | 5.53             | $1.08 \times 10^{-5}$ |
| 0.568814                 | 0.8088                    | 142.2                                  | 141.5                                  | 13.95                                  | 22.63                                      | 5.63             | $1.36 \times 10^{-5}$ |
| 0.726616                 | 1.018                     | 140.2                                  | 139.5                                  | 14.07                                  | 22.31                                      | 5.76             | $1.71 \times 10^{-5}$ |
| 0.925929                 | 1.282                     | 138.5                                  | 137.8                                  | 14.27                                  | 22.04                                      | 5.91             | $2.15 \times 10^{-5}$ |
| 1.17428                  | 1.615                     | 137.5                                  | 136.7                                  | 14.66                                  | 21.88                                      | 6.12             | $2.71 \times 10^{-5}$ |
| 1.48867                  | 2.033                     | 136.6                                  | 135.7                                  | 15.07                                  | 21.74                                      | 6.34             | $3.41 \times 10^{-5}$ |

**Table S4.** Amplitude strain sweep for hydrogels with chitosan–BTC concentration 0.5–50 Mm (supplementary material).

| Complex Shear Strain (%) | Complex Shearstress (Pa) | Shear Modulus (Complex Component) (Pa) | Shear Modulus (Elastic Component) (Pa) | Shear Modulus (Viscous Component) (Pa) | Shear Viscosity (Complex Component) (Pa s) | Phase Angle (Â°) | Torque (N m)          |
|--------------------------|--------------------------|----------------------------------------|----------------------------------------|----------------------------------------|--------------------------------------------|------------------|-----------------------|
| 0.133373                 | 0.1034                   | 77.51                                  | 77.07                                  | 8.306                                  | 12.34                                      | 6.15             | $1.73 \times 10^{-6}$ |
| 0.168133                 | 0.1302                   | 77.41                                  | 76.97                                  | 8.240                                  | 12.32                                      | 6.11             | $2.18 \times 10^{-6}$ |
| 0.210965                 | 0.1638                   | 77.66                                  | 77.2                                   | 8.411                                  | 12.36                                      | 6.22             | $2.75 \times 10^{-6}$ |
| 0.265304                 | 0.2063                   | 77.74                                  | 77.27                                  | 8.512                                  | 12.37                                      | 6.29             | $3.46 \times 10^{-6}$ |
| 0.334426                 | 0.2597                   | 77.64                                  | 77.15                                  | 8.711                                  | 12.36                                      | 6.44             | $4.35 \times 10^{-6}$ |

**Table S5.** Frequency sweep for hydrogels with chitosan–BTC concentration 1–10 mM (supplementary material).

| Frequency (Hz) | Complex Shear Strain (%) | Complex Shear Stress (Pa) | Shear Modulus (Complex Component) (Pa) | Shear Modulus (Elastic Component) (Pa) | Shear Modulus (Viscous Component) (Pa) | Shear Viscosity (Complex Component) (Pa s) | Phase Angle (Â°) | Torque (N m)          |
|----------------|--------------------------|---------------------------|----------------------------------------|----------------------------------------|----------------------------------------|--------------------------------------------|------------------|-----------------------|
| 10             | 0.88081                  | 1.605                     | 182.2                                  | 179.8                                  | 29.25                                  | 2.90                                       | 9.24             | $2.69 \times 10^{-5}$ |
| 7.943          | 0.87749                  | 1.545                     | 176.1                                  | 173.7                                  | 28.81                                  | 3.52                                       | 9.42             | $2.59 \times 10^{-5}$ |
| 6.31           | 0.92754                  | 1.594                     | 171.9                                  | 169.6                                  | 27.66                                  | 4.33                                       | 9.26             | $2.67 \times 10^{-5}$ |
| 5.012          | 0.97117                  | 1.631                     | 167.9                                  | 165.7                                  | 27.11                                  | 5.33                                       | 9.29             | $2.73 \times 10^{-5}$ |
| 3.981          | 0.97312                  | 1.600                     | 164.4                                  | 162.3                                  | 26.37                                  | 6.57                                       | 9.23             | $2.68 \times 10^{-5}$ |
| 3.162          | 0.99236                  | 1.600                     | 161.2                                  | 159.1                                  | 25.81                                  | 8.11                                       | 9.21             | $2.68 \times 10^{-5}$ |
| 2.512          | 1.00053                  | 1.579                     | 157.8                                  | 155.8                                  | 25.15                                  | 9.99                                       | 9.17             | $2.65 \times 10^{-5}$ |
| 1.995          | 1.00293                  | 1.549                     | 154.5                                  | 152.5                                  | 24.41                                  | 12.32                                      | 9.09             | $2.60 \times 10^{-5}$ |
| 1.585          | 1.00225                  | 1.519                     | 151.6                                  | 149.7                                  | 23.92                                  | 15.22                                      | 9.08             | $2.55 \times 10^{-5}$ |
| 1.259          | 1.00308                  | 1.490                     | 148.5                                  | 146.6                                  | 23.46                                  | 18.77                                      | 9.09             | $2.50 \times 10^{-5}$ |
| 1              | 1.00023                  | 1.458                     | 145.8                                  | 143.9                                  | 23.14                                  | 23.20                                      | 9.13             | $2.44 \times 10^{-5}$ |
| 0.7943         | 1.00047                  | 1.431                     | 143.1                                  | 141.2                                  | 22.77                                  | 28.67                                      | 9.16             | $2.40 \times 10^{-5}$ |
| 0.631          | 1.00238                  | 1.407                     | 140.4                                  | 138.6                                  | 22.41                                  | 35.40                                      | 9.19             | $2.36 \times 10^{-5}$ |
| 0.5012         | 0.99951                  | 1.378                     | 137.9                                  | 136.1                                  | 22.14                                  | 43.78                                      | 9.24             | $2.31 \times 10^{-5}$ |
| 0.3981         | 1.00082                  | 1.356                     | 135.4                                  | 133.7                                  | 21.87                                  | 54.15                                      | 9.29             | $2.27 \times 10^{-5}$ |
| 0.3162         | 1.00148                  | 1.334                     | 133.2                                  | 131.4                                  | 21.50                                  | 67.02                                      | 9.29             | $2.23 \times 10^{-5}$ |
| 0.2512         | 1.00089                  | 1.311                     | 131                                    | 129.3                                  | 21.16                                  | 83.01                                      | 9.29             | $2.20 \times 10^{-5}$ |
| 0.1995         | 1.00018                  | 1.291                     | 129.1                                  | 127.4                                  | 20.86                                  | 103                                        | 9.3              | $2.16 \times 10^{-5}$ |
| 0.1585         | 1.00076                  | 1.273                     | 127.2                                  | 125.6                                  | 20.59                                  | 127.8                                      | 9.31             | $2.13 \times 10^{-5}$ |



**Table S6.** Frequency strain sweep for hydrogels with chitosan–BTC concentration 1–50 mM (supplementary material).

| Frequency (Hz) | Complex shear strain (%) | Complex shear stress (Pa) | Shear modulus (complex component) (Pa) | Shear modulus (elastic component) (Pa) | Shear modulus (viscous component) (Pa) | Shear viscosity (complex component) (Pa s) | Phase angle (°) | Torque (N m) |
|----------------|--------------------------|---------------------------|----------------------------------------|----------------------------------------|----------------------------------------|--------------------------------------------|-----------------|--------------|
| 10             | 0.925802                 | 1.123                     | 121.3                                  | 119.9                                  | 18.18                                  | 1.93                                       | 8.62            | 1.88E-05     |
| 7.943          | 0.948839                 | 1.111                     | 117.1                                  | 115.7                                  | 17.91                                  | 2.346                                      | 8.8             | 1.86E-05     |
| 6.31           | 0.927143                 | 1.063                     | 114.6                                  | 113.4                                  | 16.64                                  | 2.891                                      | 8.35            | 1.78E-05     |
| 5.012          | 0.96588                  | 1.083                     | 112.1                                  | 111                                    | 15.99                                  | 3.561                                      | 8.2             | 1.82E-05     |
| 3.981          | 0.972022                 | 1.068                     | 109.9                                  | 108.8                                  | 15.35                                  | 4.393                                      | 8.03            | 1.79E-05     |
| 3.162          | 0.991419                 | 1.07                      | 108                                    | 107                                    | 14.68                                  | 5.433                                      | 7.82            | 1.79E-05     |
| 2.512          | 0.999767                 | 1.059                     | 105.9                                  | 105                                    | 14.21                                  | 6.712                                      | 7.71            | 1.78E-05     |
| 1.995          | 1.0027                   | 1.041                     | 103.9                                  | 103                                    | 13.61                                  | 8.285                                      | 7.53            | 1.75E-05     |
| 1.585          | 1.0019                   | 1.024                     | 102.2                                  | 101.3                                  | 13.18                                  | 10.26                                      | 7.41            | 1.72E-05     |
| 1.259          | 1.00231                  | 1.007                     | 100.4                                  | 99.63                                  | 12.77                                  | 12.7                                       | 7.3             | 1.69E-05     |
| 1              | 1.00048                  | 0.9902                    | 98.98                                  | 98.19                                  | 12.49                                  | 15.75                                      | 7.25            | 1.66E-05     |
| 0.7943         | 1.00114                  | 0.9755                    | 97.44                                  | 96.68                                  | 12.14                                  | 19.52                                      | 7.16            | 1.63E-05     |
| 0.631          | 1.00153                  | 0.9597                    | 95.82                                  | 95.09                                  | 11.84                                  | 24.17                                      | 7.09            | 1.61E-05     |
| 0.5012         | 0.999925                 | 0.9449                    | 94.5                                   | 93.78                                  | 11.63                                  | 30.01                                      | 7.07            | 1.58E-05     |
| 0.3981         | 1.00077                  | 0.932                     | 93.13                                  | 92.44                                  | 11.33                                  | 37.23                                      | 6.99            | 1.56E-05     |
| 0.3162         | 1.00124                  | 0.9195                    | 91.83                                  | 91.16                                  | 11.12                                  | 46.22                                      | 6.95            | 1.54E-05     |
| 0.2512         | 1.00099                  | 0.906                     | 90.51                                  | 89.83                                  | 11                                     | 57.35                                      | 6.98            | 1.52E-05     |
| 0.1995         | 0.999752                 | 0.8931                    | 89.33                                  | 88.68                                  | 10.79                                  | 71.26                                      | 6.93            | 1.50E-05     |
| 0.1585         | 1.00028                  | 0.8831                    | 88.28                                  | 87.64                                  | 10.64                                  | 88.65                                      | 6.92            | 1.48E-05     |
| 0.1259         | 1.00032                  | 0.8721                    | 87.18                                  | 86.54                                  | 10.53                                  | 110.2                                      | 6.94            | 1.46E-05     |
| 0.1            | 0.997762                 | 0.8596                    | 86.15                                  | 85.53                                  | 10.38                                  | 137.1                                      | 6.92            | 1.44E-05     |

**Table S7.** Frequency strain sweep for hydrogels with chitosan–BTC concentration 0.5–50 mM (supplementary material).

| Frequency (Hz) | Complex Shear Strain (%) | Complex Shear Stress (Pa) | Shear Modulus (Complex Component) (Pa) | Shear Modulus (Elastic Component) (Pa) | Shear Modulus (Viscous Component) (Pa) | Shear Viscosity (Complex Component) (Pa s) | Phase Angle (°) | Torque (N m)          |
|----------------|--------------------------|---------------------------|----------------------------------------|----------------------------------------|----------------------------------------|--------------------------------------------|-----------------|-----------------------|
| 10             | 0.91961                  | 0.7309                    | 79.48                                  | 78.12                                  | 14.65                                  | 1.265                                      | 10.62           | $1.23 \times 10^{-5}$ |
| 7.943          | 0.97892                  | 0.7517                    | 76.79                                  | 75.54                                  | 13.77                                  | 1.539                                      | 10.33           | $1.26 \times 10^{-5}$ |
| 6.31           | 0.95323                  | 0.718                     | 75.32                                  | 74.22                                  | 12.85                                  | 1.9                                        | 9.82            | $1.20 \times 10^{-5}$ |
| 5.012          | 0.96221                  | 0.7092                    | 73.71                                  | 72.66                                  | 12.38                                  | 2.341                                      | 9.67            | $1.19 \times 10^{-5}$ |
| 3.981          | 0.97024                  | 0.699                     | 72.04                                  | 71.06                                  | 11.85                                  | 2.88                                       | 9.47            | $1.17 \times 10^{-5}$ |
| 3.162          | 0.99083                  | 0.6994                    | 70.59                                  | 69.65                                  | 11.45                                  | 3.553                                      | 9.34            | $1.17 \times 10^{-5}$ |
| 2.512          | 1.00014                  | 0.6909                    | 69.08                                  | 68.2                                   | 11.01                                  | 4.377                                      | 9.17            | $1.16 \times 10^{-5}$ |
| 1.995          | 1.00287                  | 0.6784                    | 67.64                                  | 66.81                                  | 10.6                                   | 5.396                                      | 9.02            | $1.14 \times 10^{-5}$ |

|        |         |        |       |       |       |       |      |                       |
|--------|---------|--------|-------|-------|-------|-------|------|-----------------------|
| 1.585  | 1.00168 | 0.6642 | 66.31 | 65.51 | 10.28 | 6.659 | 8.91 | $1.11 \times 10^{-5}$ |
| 1.259  | 1.0028  | 0.652  | 65.02 | 64.25 | 9.933 | 8.22  | 8.79 | $1.09 \times 10^{-5}$ |
| 1      | 1.00032 | 0.6387 | 63.85 | 63.12 | 9.646 | 10.16 | 8.69 | $1.07 \times 10^{-5}$ |
| 0.7943 | 1.00098 | 0.6275 | 62.69 | 61.98 | 9.382 | 12.56 | 8.61 | $1.05 \times 10^{-5}$ |
| 0.631  | 1.00217 | 0.6171 | 61.57 | 60.9  | 9.1   | 15.53 | 8.5  | $1.03 \times 10^{-5}$ |
| 0.5012 | 1.00038 | 0.6056 | 60.54 | 59.88 | 8.877 | 19.22 | 8.43 | $1.02 \times 10^{-5}$ |
| 0.3981 | 1.00075 | 0.596  | 59.55 | 58.92 | 8.644 | 23.81 | 8.35 | $9.99 \times 10^{-6}$ |
| 0.3162 | 1.00069 | 0.5867 | 58.63 | 58.02 | 8.424 | 29.51 | 8.26 | $9.83 \times 10^{-6}$ |
| 0.2512 | 1.00114 | 0.5784 | 57.77 | 57.19 | 8.204 | 36.6  | 8.16 | $9.69 \times 10^{-6}$ |
| 0.1995 | 1.00065 | 0.5704 | 57.01 | 56.45 | 7.979 | 45.47 | 8.05 | $9.56 \times 10^{-6}$ |
| 0.1585 | 1.00056 | 0.5633 | 56.29 | 55.75 | 7.801 | 56.53 | 7.97 | $9.44 \times 10^{-6}$ |
| 0.1259 | 1.00153 | 0.5569 | 55.6  | 55.08 | 7.572 | 70.29 | 7.83 | $9.33 \times 10^{-6}$ |
| 0.1    | 0.99938 | 0.5496 | 55    | 54.49 | 7.449 | 87.53 | 7.78 | $9.21 \times 10^{-6}$ |

**Table S8.** Frequency strain sweep for hydrogels with chitosan–BTC concentration 0.5–50 mM (supplementary material).

| Frequency<br>(Hz) | Complex<br>Shear<br>Strain (%) | Complex<br>Shear<br>Stress (Pa) | Shear<br>Modulus<br>(Complex<br>Component)<br>(Pa) | Shear<br>Modulus<br>(Elastic<br>Component)<br>(Pa) | Shear<br>Modulus<br>(Viscous<br>Component)<br>(Pa) | Shear<br>Viscosity<br>(Complex<br>Component)<br>(Pa s) | Phase<br>Angle (°) | Torque<br>(N m)       |
|-------------------|--------------------------------|---------------------------------|----------------------------------------------------|----------------------------------------------------|----------------------------------------------------|--------------------------------------------------------|--------------------|-----------------------|
| 10                | 0.919613                       | 0.7309                          | 79.48                                              | 78.12                                              | 14.65                                              | 1.265                                                  | 10.62              | $1.23 \times 10^{-5}$ |
| 7.943             | 0.978926                       | 0.7517                          | 76.79                                              | 75.54                                              | 13.77                                              | 1.539                                                  | 10.33              | $1.26 \times 10^{-5}$ |
| 6.31              | 0.953236                       | 0.718                           | 75.32                                              | 74.22                                              | 12.85                                              | 1.9                                                    | 9.82               | $1.20 \times 10^{-5}$ |
| 5.012             | 0.962218                       | 0.7092                          | 73.71                                              | 72.66                                              | 12.38                                              | 2.341                                                  | 9.67               | $1.19 \times 10^{-5}$ |
| 3.981             | 0.970245                       | 0.699                           | 72.04                                              | 71.06                                              | 11.85                                              | 2.88                                                   | 9.47               | $1.17 \times 10^{-5}$ |
| 3.162             | 0.990843                       | 0.6994                          | 70.59                                              | 69.65                                              | 11.45                                              | 3.553                                                  | 9.34               | $1.17 \times 10^{-5}$ |
| 2.512             | 1.00014                        | 0.6909                          | 69.08                                              | 68.2                                               | 11.01                                              | 4.377                                                  | 9.17               | $1.16 \times 10^{-5}$ |
| 1.995             | 1.00287                        | 0.6784                          | 67.64                                              | 66.81                                              | 10.6                                               | 5.396                                                  | 9.02               | $1.14 \times 10^{-5}$ |
| 1.585             | 1.00168                        | 0.6642                          | 66.31                                              | 65.51                                              | 10.28                                              | 6.659                                                  | 8.91               | $1.11 \times 10^{-5}$ |
| 1.259             | 1.0028                         | 0.652                           | 65.02                                              | 64.25                                              | 9.933                                              | 8.22                                                   | 8.79               | $1.09 \times 10^{-5}$ |
| 1                 | 1.00032                        | 0.6387                          | 63.85                                              | 63.12                                              | 9.646                                              | 10.16                                                  | 8.69               | $1.07 \times 10^{-5}$ |
| 0.7943            | 1.00098                        | 0.6275                          | 62.69                                              | 61.98                                              | 9.382                                              | 12.56                                                  | 8.61               | $1.05 \times 10^{-5}$ |
| 0.631             | 1.00217                        | 0.6171                          | 61.57                                              | 60.9                                               | 9.1                                                | 15.53                                                  | 8.5                | $1.03 \times 10^{-5}$ |
| 0.5012            | 1.00038                        | 0.6056                          | 60.54                                              | 59.88                                              | 8.877                                              | 19.22                                                  | 8.43               | $1.02 \times 10^{-5}$ |
| 0.3981            | 1.00075                        | 0.596                           | 59.55                                              | 58.92                                              | 8.644                                              | 23.81                                                  | 8.35               | $9.99 \times 10^{-6}$ |
| 0.3162            | 1.00069                        | 0.5867                          | 58.63                                              | 58.02                                              | 8.424                                              | 29.51                                                  | 8.26               | $9.83 \times 10^{-6}$ |
| 0.2512            | 1.00114                        | 0.5784                          | 57.77                                              | 57.19                                              | 8.204                                              | 36.6                                                   | 8.16               | $9.69 \times 10^{-6}$ |
| 0.1995            | 1.00065                        | 0.5704                          | 57.01                                              | 56.45                                              | 7.979                                              | 45.47                                                  | 8.05               | $9.56 \times 10^{-6}$ |
| 0.1585            | 1.00056                        | 0.5633                          | 56.29                                              | 55.75                                              | 7.801                                              | 56.53                                                  | 7.97               | $9.44 \times 10^{-6}$ |
| 0.1259            | 1.00153                        | 0.5569                          | 55.6                                               | 55.08                                              | 7.572                                              | 70.29                                                  | 7.83               | $9.33 \times 10^{-6}$ |
| 0.1               | 0.999381                       | 0.5496                          | 55                                                 | 54.49                                              | 7.449                                              | 87.53                                                  | 7.78               | $9.21 \times 10^{-6}$ |
